# Supplementary material for: Portfolio of colloidally stable gold–gold sulfide nanoparticles and their use in broad-band photoacoustic imaging
Source: Royal Society of Chemistry journal article supplement (doi:10.1039/d4nr03509g), 2024-12-04
Supplement: d4nr03509g1.pdf [file d4nr03509g1.pdf]

## Supporting Information

### Portfolio of colloidally stable gold-gold sulfide nanoparticles and their use in broad-band photoacoustic imaging

Mine Demir<sup>1,†</sup>, M. Natali Çizmeciyani<sup>2,3,\*,</sup>, Dilara Sipahioğlu<sup>1</sup>, Alireza Khoshzaban<sup>2</sup>, M. Burçin Ünlü<sup>2,\*,†</sup>, Havva Yağcı Acar<sup>1,\*</sup>

<sup>1</sup> Department of Chemistry, Koç University, Sarıyer, İstanbul, 34450, Türkiye

<sup>2</sup> Department of Physics, Boğaziçi University, Bebek, İstanbul, 34342, Türkiye

<sup>3</sup> Center for Life Sciences and Technologies (LifeSci), Boğaziçi University, 34342, İstanbul, Türkiye

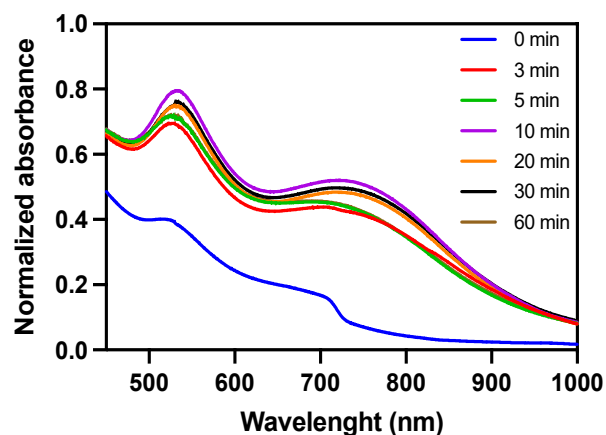

**Figure S1** Time dependent absorbance spectra of the reaction mixture following the progress of GGS formation and growth in the absence of a coating material.

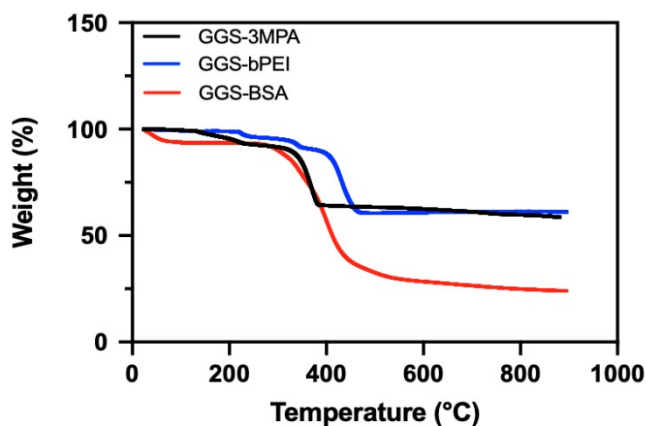

**Figure S2** Thermogravimetric analysis of GGS-3MPA, GGS-bPEI, and GGS-BSA.

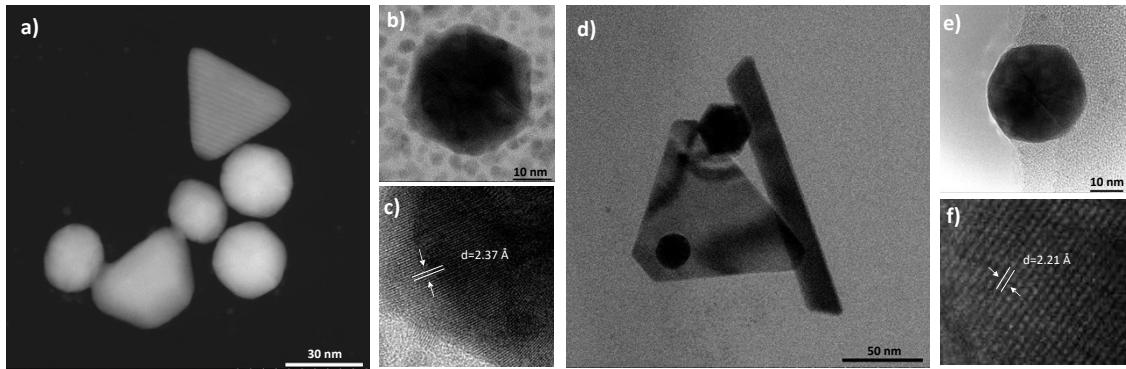

**Figure S3** TEM images of GGS-bPEI at different magnifications (a-b) and lattice spacing (c). TEM images of GGS-BSA (d-e) and lattice spacing (f).

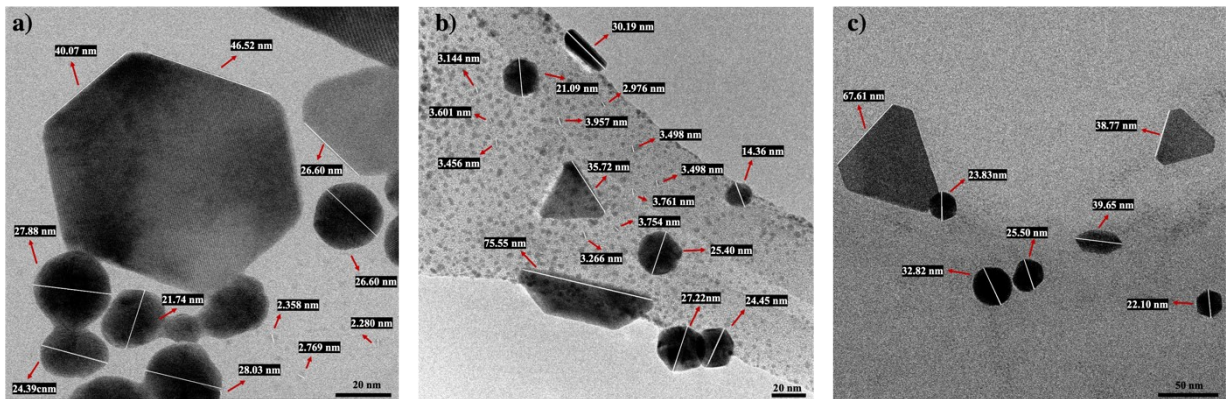

**Figure S4** Size analysis of (a) GGS-3MPA, (b) GGS-bPEI, and (c) GGS-BSA NPs from TEM images.

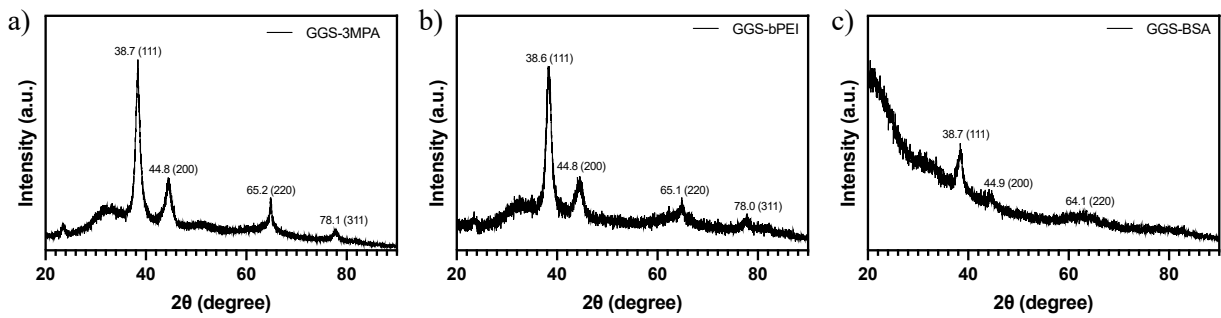

**Figure S5** XRD of (a) GGS-3MPA, (b) GGS-bPEI, and (c) GGS-BSA.

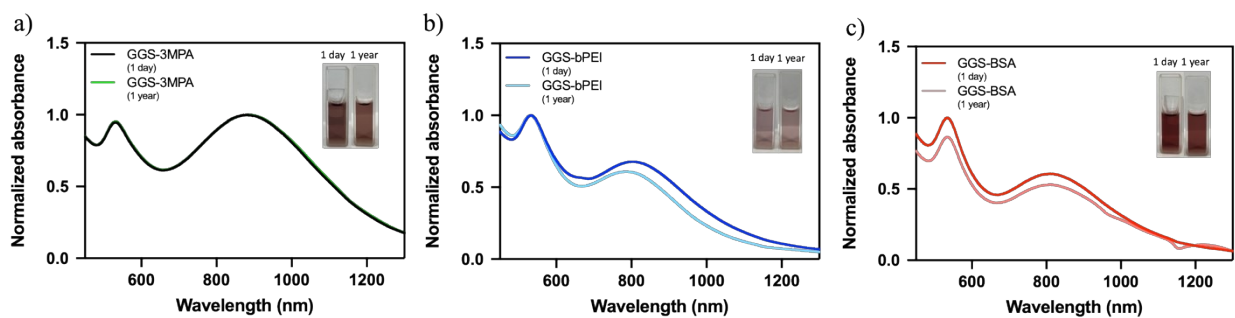

d)

| Sample   | Dh-number <sup>a</sup><br>(nm) |         |        | Dh-intensity <sup>b</sup><br>(nm) |         |        | Zeta potential<br>(mV) |         |        |
|----------|--------------------------------|---------|--------|-----------------------------------|---------|--------|------------------------|---------|--------|
|          | 1 day                          | 1 month | 1 year | 1 day                             | 1 month | 1 year | 1 day                  | 1 month | 1 year |
| GGS-3MPA | 3.3                            | 3.3     | 3.2    | 64.4                              | 65.0    | 82.9   | -34.1                  | -33.3   | -5.5   |
| GGS-bPEI | 4.4                            | 4.1     | 4.0    | 101.5                             | 98.2    | 80.3   | +8.9                   | +9.1    | +9.5   |
| GGS-BSA  | 40.9                           | 40.0    | 41.6   | 107.7                             | 103.5   | 105.5  | +25.1                  | +23.1   | +15.3  |

<sup>a</sup>Hydrodynamic size measured by DLS and reported as the number average. <sup>b</sup>Hydrodynamic sized measured by DLS and reported as the intensity average.

**Figure S6** The absorbance spectrum of (a) GGS-3MPA, (b) GGS-bPEI, (c) GGS-BSA, and their (d) hydrodynamic size and zeta potential after the first day of synthesis and one year later. Samples were kept in the dark and +4 °C conditions.

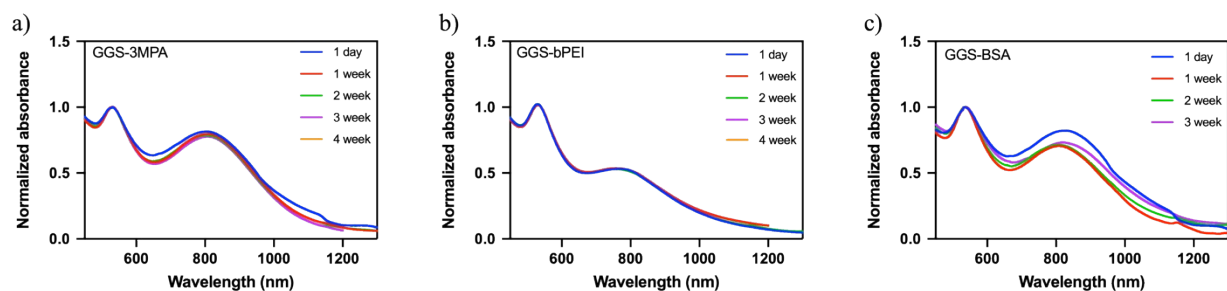

d)

| Sample   | Dh-number <sup>a</sup><br>(nm) |        |        |        |        | Dh-intensity <sup>b</sup><br>(nm) |        |        |        |        | Zeta potential<br>(mV) |        |        |        |        |
|----------|--------------------------------|--------|--------|--------|--------|-----------------------------------|--------|--------|--------|--------|------------------------|--------|--------|--------|--------|
|          | 1 day                          | 1 week | 2 week | 3 week | 4 week | 1 day                             | 1 week | 2 week | 3 week | 4 week | 1 day                  | 1 week | 2 week | 3 week | 4 week |
| GGS-3MPA | 1.6                            | 1.8    | 1.6    | 1.8    | 1.5    | 48.0                              | 55.2   | 52.6   | 48.5   | 66.7   | -38.6                  | -32.6  | -35.4  | -38.6  | -28.3  |
| GGS-bPEI | 2.9                            | 3.0    | 3.1    | 2.8    | 3.2    | 70.2                              | 68.1   | 63.3   | 61.2   | 69.1   | +25.8                  | +15.6  | +17.6  | +17.8  | +10.2  |
| GGS-BSA  | 3.3                            | 4.6    | 4.8    | 6.3    | -      | 91.8                              | 97.3   | 98.2   | 174.4  | -      | +19.5                  | +11.5  | +12.5  | +13.4  | -      |

<sup>a</sup>Hydrodynamic size measured by DLS and reported as the number average. <sup>b</sup>Hydrodynamic sized measured by DLS and reported as the intensity average.

**Figure S7** The absorbance spectrum of (a) GGS-3MPA, (b) GGS-bPEI, (c) GGS-BSA, and their (d) hydrodynamic size and zeta potential followed for 4 weeks. Samples were kept in the dark and +37 °C conditions.

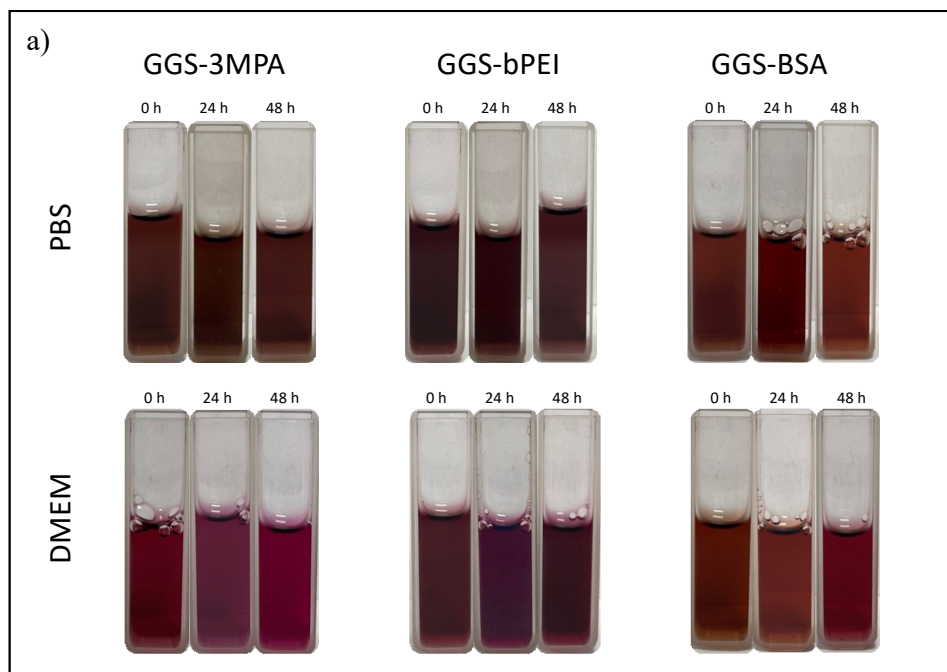

b)

| Sample   | Dh-number <sup>a</sup><br>(nm) |      |      | Dh-intensity <sup>b</sup><br>(nm) |       |       | Zeta potential<br>(mV) |      |      |
|----------|--------------------------------|------|------|-----------------------------------|-------|-------|------------------------|------|------|
|          | 0 h                            | 24 h | 48 h | 0 h                               | 24 h  | 48 h  | 0 h                    | 24 h | 48 h |
| GGs-3MPA | 0.75                           | 0.73 | 0.85 | 35.05                             | 34.54 | 36.11 | -10.1                  | -9.2 | -9.0 |
| GGs-bPEI | 1.41                           | 1.30 | 1.43 | 51.23                             | 59.05 | 58.17 | +3.1                   | +2.5 | +2.2 |
| GGs-BSA  | 3.23                           | 3.32 | 4.01 | 105.11                            | 122.5 | 120.6 | +11.2                  | +9.6 | +9.3 |

<sup>a</sup>Hydrodynamic size measured by DLS and reported as the number average. <sup>b</sup>Hydrodynamic sized measured by DLS and reported as the intensity average.

**Figure S8** a) Pictures of GGS-3MPA, GGS-bPEI, and GGS-BSA solutions in PBS and DMEM. b) Hydrodynamic size and zeta potential of GGS solutions in PBS. Samples were kept in the dark at +37 °C.

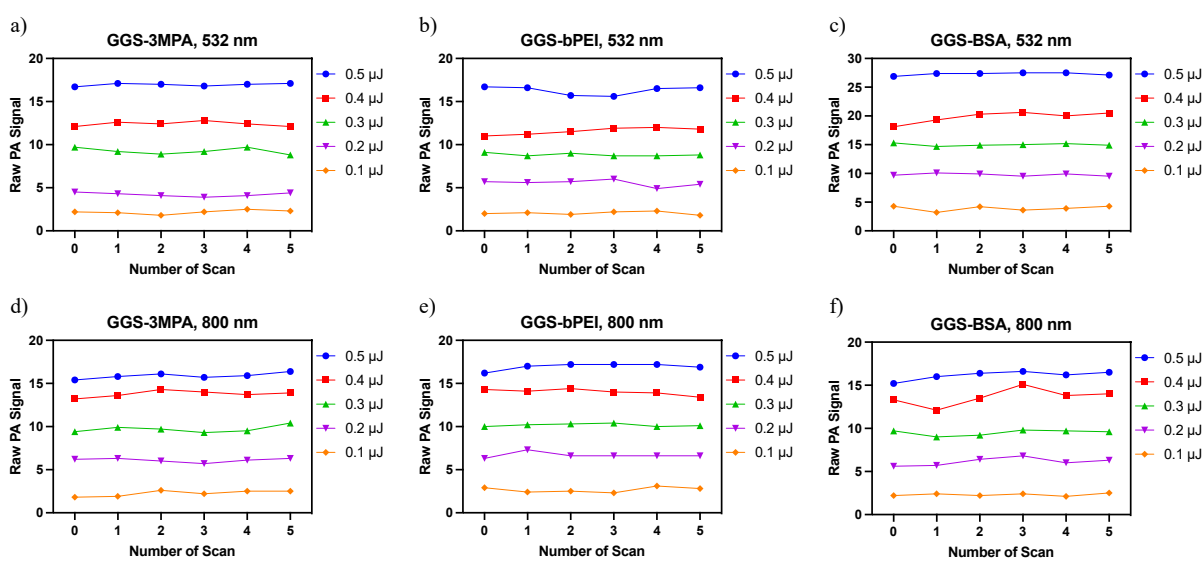

**Figure S9** Raw PA Signal of (a) GGS-3MPA, (b) GGS-bPEI, (c) GGS-BSA at 532 nm laser exposure. Raw PA Signal (d) GGS-3MPA, (e) GGS-bPEI, (f) GGS-BSA at 800 nm laser exposure.

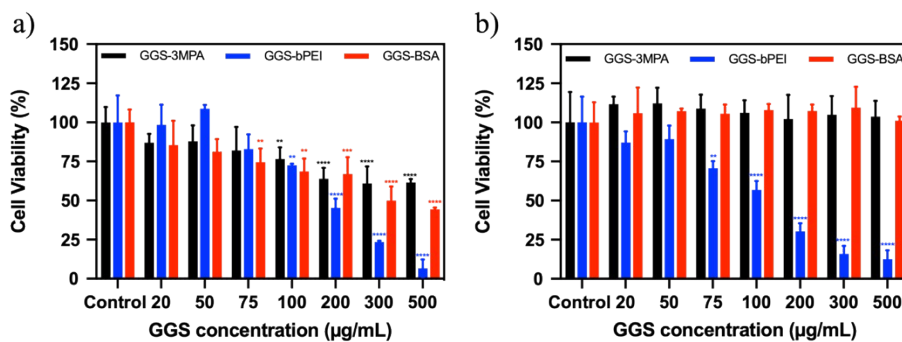

**Figure S10** Dose-dependent cell viability of (a) L929 and (b) MDA-MB-231 cells treated with GGS-3MPA, GGS-bPEI, and GGS-BSA after 48 h incubation. Control: Untreated cells. Data were shown as mean  $\pm$  SD (n=5). Significance levels are indicated as follows:  $p = 0.0332$  (\*),  $p = 0.0021$  (\*\*),  $p = 0.002$  (\*\*\*), and  $p < 0.001$  (\*\*\*\*).

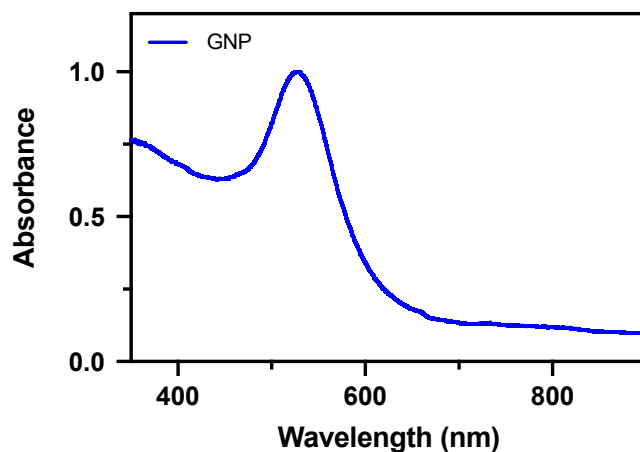

**Figure S11** Absorbance spectrum of GNP.

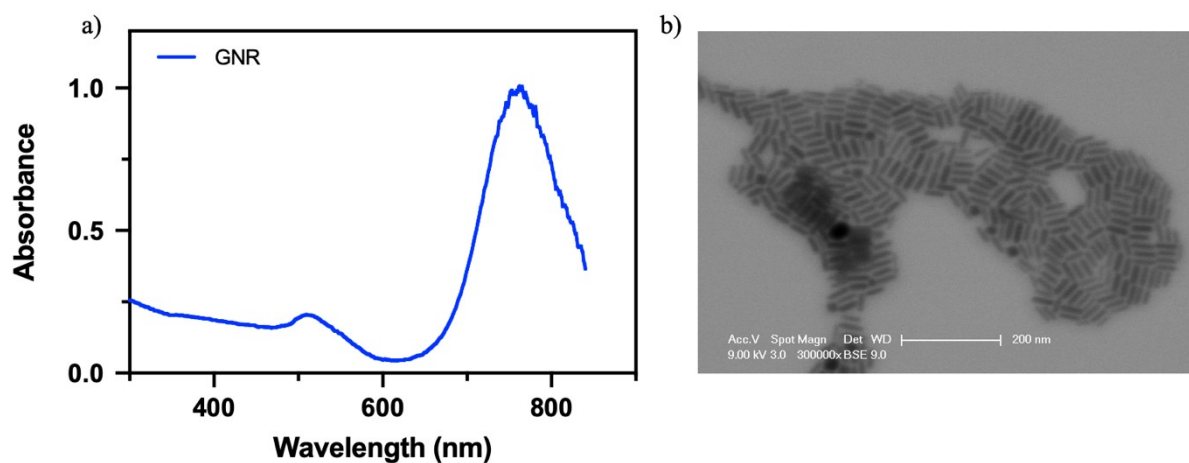

**Figure S12** (a) Absorbance spectrum of GNR, (b) TEM image of GNR.

| Sample   | $\mu_E=0.25 \text{ mm}^{-1}$ |              | $\mu_E=0.5 \text{ mm}^{-1}$ |              |
|----------|------------------------------|--------------|-----------------------------|--------------|
|          | Slope @532nm                 | Slope @800nm | Slope @532nm                | Slope @800nm |
| GGs-3MPA | 8.7                          | 10.5         | 8.6                         | 9.1          |
| GGs-bPEI | 7.3                          | 8.6          | 8.0                         | 8.1          |
| GGs-BSA  | 10.5                         | 10.1         | 8.6                         | 10.0         |
| GNP      | 4.2                          | -            | 3.7                         | -            |
| GNR      | -                            | 7.9          | -                           | -            |

**Table S1** Photoacoustic signal efficiencies of GGS, GNP, and GNR.

### Line & Edge Spread Functions:

We further characterized the resolution power of our PAM setup with a sharp-edged sample scanned with the microscopy system. The results suggest that the FWHM of the minimum resolvable feature is 4 and 6  $\mu\text{m}$  for 532 nm and 800 nm, respectively.

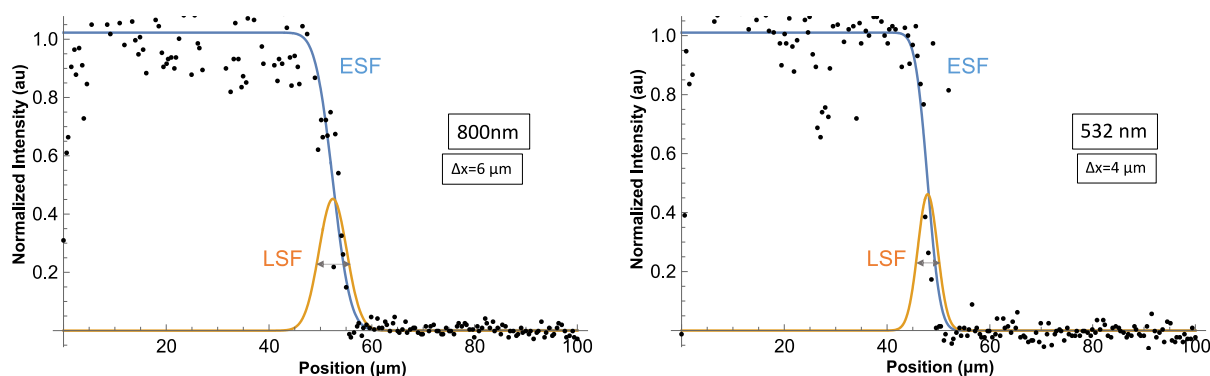

**Figure S13** Experimentally measured edge and line spread functions at 800 and 532 nm wavelengths.

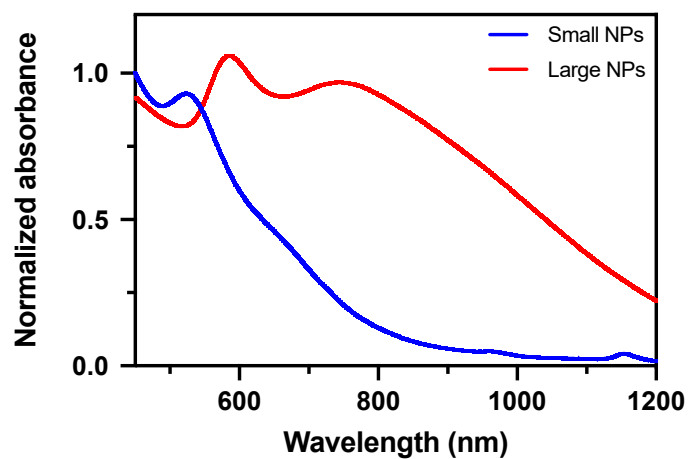

**Figure S14** Absorbance spectrum of small and large GGS-3MPA NPs separated via centrifugation.
